# Supplementary material for: Early Prediction of Organ Failures in Patients with Acute Pancreatitis Using Text Mining
Source: Hindawi journal article supplement (doi:10.1155/2021/6683942), 2021-05-11
Supplement: f1 [file 6683942.f1.docx]

Figure S1. An example of clinical notes in West China Hospital, Sichuan University.


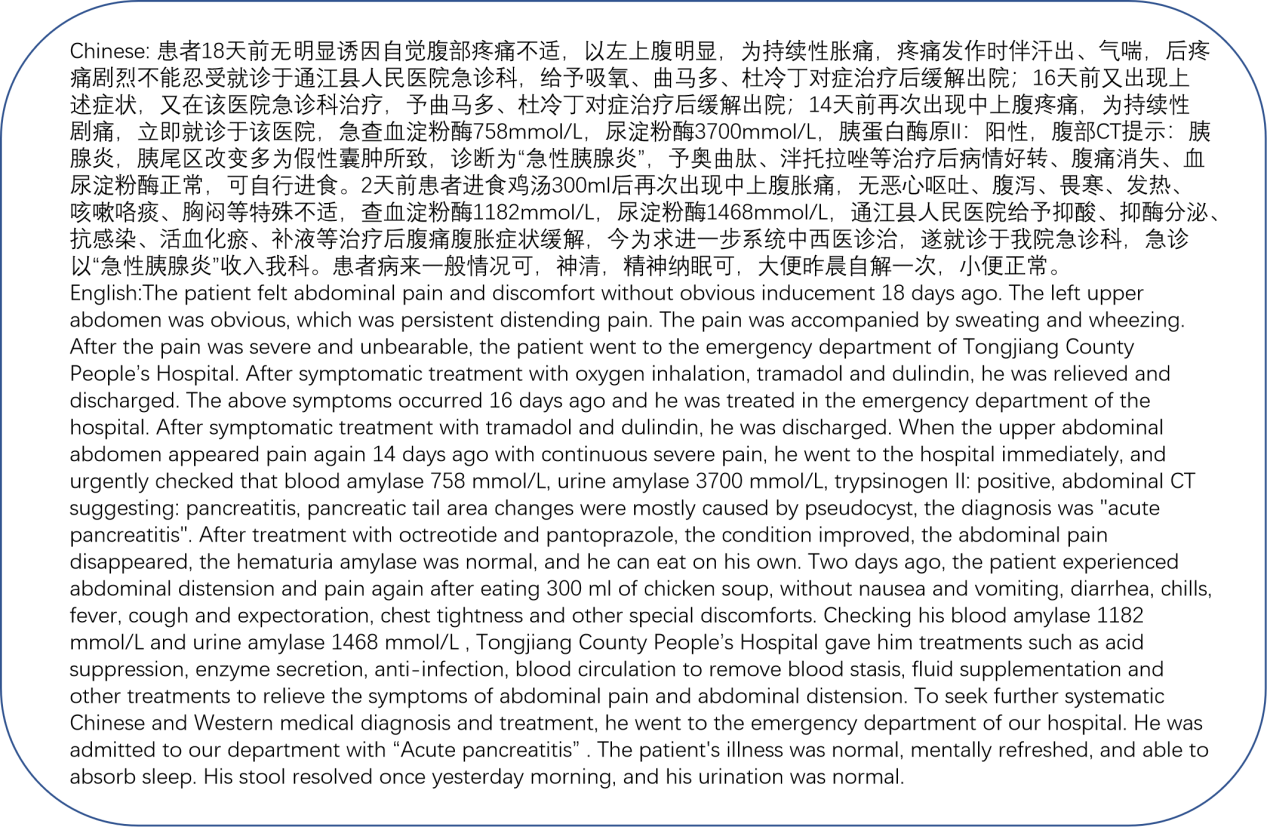


Figure S2. Differences in the distribution of variables before and after filling.


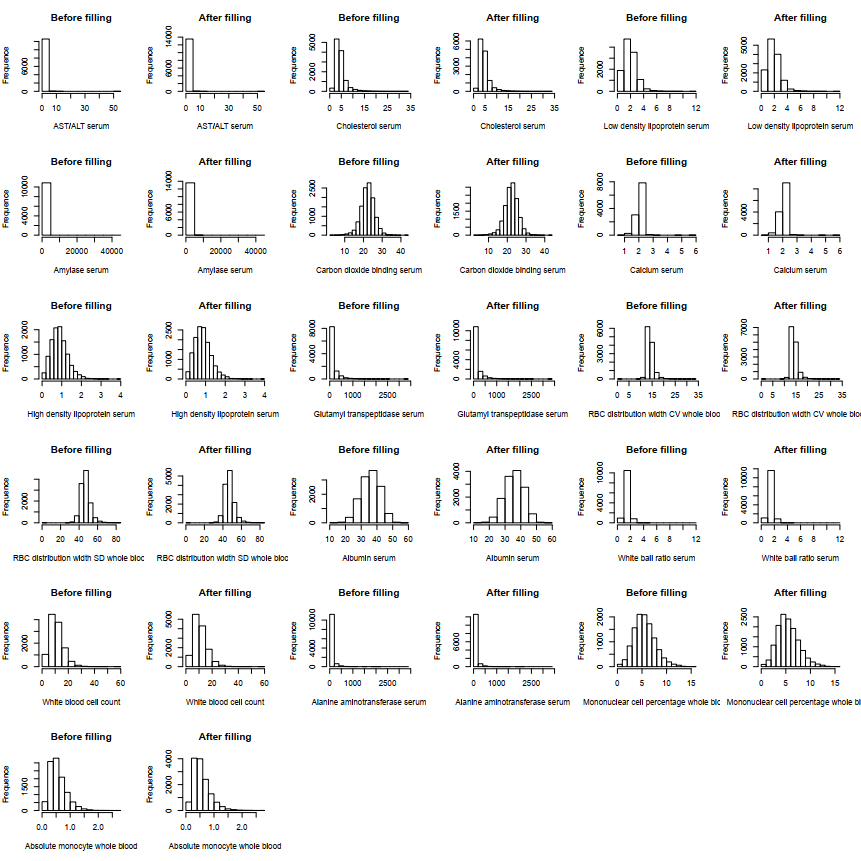


Table S1. The top 30 important Chinese word segmentation by attention mechanism.

| No. | Chinese word segmentation | English | Weight |
| --- | --- | --- | --- |
| 1 | 胸膝 | Chest knee | 0.02488 |
| 2 | 胁部 | Wakibe | 0.02066 |
| 3 | 紧自服 | Self-contained | 0.01954 |
| 4 | 院中 | In the hospital | 0.01949 |
| 5 | 伴解稀 | Companion Solution | 0.01867 |
| 6 | 便色 | Instant color | 0.01866 |
| 7 | 发生意外 | accident | 0.01839 |
| 8 | 摔致 | Fall to | 0.01829 |
| 9 | 移致 | Shift to | 0.01811 |
| 10 | 好二便 | Good two then | 0.01774 |
| 11 | 出微 | Out of micro | 0.01745 |
| 12 | 溢出 | overflow | 0.01681 |
| 13 | 皮色 | Skin color | 0.01675 |
| 14 | 烫伤 | scald | 0.01653 |
| 15 | 漏入 | Leak in | 0.01651 |
| 16 | 立时 | Immediately | 0.01628 |
| 17 | 明天 | tomorrow | 0.01626 |
| 18 | 前躯 | Forequarters | 0.01623 |
| 19 | 样黄 | Like yellow | 0.01604 |
| 20 | 香菇 | Shiitake | 0.01534 |
| 21 | 皮下出血点 | Subcutaneous bleeding point | 0.01529 |
| 22 | 不时 | From time to time | 0.01518 |
| 23 | 发花 | Send flowers | 0.01508 |
| 24 | 转如 | Turn like | 0.01508 |
| 25 | 零食 | Snacks | 0.01503 |
| 26 | 烤牛肉 | roasted beef | 0.01501 |
| 27 | 过辣后 | After the spicy | 0.01461 |
| 28 | 伤及 | Hurt | 0.01460 |
| 29 | 常量 | constant | 0.01443 |
| 30 | 禁水后 | After water deprivation | 0.01438 |
